# Supplementary material for: Genome-Wide Identification and Analysis of CC-NBS-LRR Family in Response to Downy Mildew and Black Rot in Chinese Cabbage
Source: MDPI journal article supplement (doi:10.3390/ijms22084266), 2021-04-20
Supplement: s1 [file s1]

**Table S1 The homologous gene of *BrCC-NBS-LRRs* in *Arabidopsis thaliana* and their positive function**

| Gene No.  | Homologue Gene in <i>Ar.</i> | Function of <i>Ar.</i> genes                                                       |
|-----------|------------------------------|------------------------------------------------------------------------------------|
| Bra019755 |                              |                                                                                    |
| Bra026923 |                              |                                                                                    |
| Bra026924 | AT1G12210                    | RFL1 has high sequence similarity to the adjacent disease resistance (R) gene RPS5 |
| Bra026977 |                              |                                                                                    |
| Bra026978 |                              |                                                                                    |
| Bra002495 |                              |                                                                                    |
| Bra016781 | AT1G12220                    | Disease resistance protein (CC-NBS-LRR class) family                               |
| Bra016782 |                              |                                                                                    |
| Bra016785 |                              |                                                                                    |
| Bra019752 |                              |                                                                                    |
| Bra019754 | At1g12280                    | Encodes a NB-LRR protein SUMM2 involved in defense response to bacterium           |
| Bra015597 |                              |                                                                                    |
| Bra026979 | AT1G12290                    | Disease resistance protein (CC-NBS-LRR class) family                               |
| Bra018834 |                              |                                                                                    |
| Bra018835 | At1g15890                    | Disease resistance protein (CC-NBS-LRR class) family                               |
| Bra018863 |                              |                                                                                    |
| Bra026094 |                              |                                                                                    |
| Bra027866 | AT1G58410                    | Disease resistance protein (CC-NBS-LRR class) family                               |
| Bra035424 |                              |                                                                                    |
| Bra029405 | At1g59620                    | Disease resistance protein (CC-NBS-LRR class) family                               |
| Bra013134 |                              |                                                                                    |
| Bra027097 | AT1G61180                    | LRR and NB-ARC domains-containing disease resistance protein;                      |

|           |           |                                                                                                                                                 |
|-----------|-----------|-------------------------------------------------------------------------------------------------------------------------------------------------|
| Bra036995 | AT1G61190 | Disease resistance protein (CC-NBS-LRR class) family                                                                                            |
| Bra031482 | AT1G63350 | NB-ARC domain-containing disease resistance protein                                                                                             |
| Bra027332 | AT3G14470 | NB-ARC domain-containing disease resistance protein                                                                                             |
| Bra037123 | AT3G46730 | NB-ARC domain-containing disease resistance protein                                                                                             |
| Bra036845 | AT3G50950 | Encodes a canonical CC-type NLR protein that is required for the recognition of the T3SE HopZ1a from the pathogenic bacteria <i>P. syringae</i> |
| Bra030778 | AT4G10780 | LRR and NB-ARC domains-containing disease resistance protein;(source:Araport11)                                                                 |
| Bra013947 | AT4G26090 | Resistant to <i>P. SYRINGAE</i> 2, RPS2                                                                                                         |
| Bra026368 | AT4G27190 | NB-ARC domain-containing disease resistance protein                                                                                             |
| Bra019063 |           |                                                                                                                                                 |
| Bra034631 | AT4G27220 | NB-ARC domain-containing disease resistance protein                                                                                             |
| Bra011432 | AT4G33300 | Encodes a member of the ADR1 family nucleotide-binding leucine-rich repeat (NB-LRR) immune receptors                                            |
| Bra013213 | AT5G48620 | Disease resistance protein (CC-NBS-LRR class) family                                                                                            |
| Bra030779 | AT5G63020 | Disease resistance protein (CC-NBS-LRR class) family                                                                                            |
| Bra017572 |           |                                                                                                                                                 |
| Bra026682 |           |                                                                                                                                                 |
| Bra018245 |           |                                                                                                                                                 |
| Bra009882 | AT5G66900 | Disease resistance protein (CC-NBS-LRR class) family                                                                                            |
| Bra037139 |           |                                                                                                                                                 |

**Table S2. The Chromosome locations of CC-NBS-LRR in *Arabidopsis thaliana* and Chinese cabbage.**

| Chr.1 | Chr.2 | Chr.3 | Chr.4 | Chr.5 | Chr.6 | Chr.7 | Chr.8 | Chr.9 | Chr.10 |
|-------|-------|-------|-------|-------|-------|-------|-------|-------|--------|
|       |       |       |       |       |       |       |       |       |        |

|                             |    |   |   |   |   |   |   |   |    |   |
|-----------------------------|----|---|---|---|---|---|---|---|----|---|
| <i>Arabidopsis thaliana</i> | 16 | 0 | 0 | 0 | 8 | – | – | – | –  | – |
| <i>Brassica rapa</i>        | 5  | 1 | 4 | 0 | 2 | 8 | 0 | 6 | 12 | 2 |

**Table S3. CC-NBS-LRR genes in *Arabidopsis thaliana*, rice and Chinese cabbage**

| Latin Name                  | Number |
|-----------------------------|--------|
| <i>Arabidopsis thaliana</i> | 21     |
| <i>Oryza sativa</i>         | 8      |
| <i>Brassica rapa</i>        | 40     |

**Table S4 Motif sequences detected by MEME**

| Motif name | Motif sequece                            |
|------------|------------------------------------------|
| Motif1     | KVKSCFLYCSLFPEDYEIDKEELIEYWIGEGFIDE      |
| Motif2     | KFVLLDDIWEKVBLKKIGVPYPTRENGSKVVFTTRSREVC |
| Motif3     | GJYGMGGVGKTTLLTQINNKF                    |
| Motif4     | PLALNVIGETMASKRTVQEWRAVDVLTSSA           |
| motif5     | TVKMHDVVREMAWIASDLGK                     |
| Motif6     | LVSLRYLBLSGKISRLPVGLQKLKKLIHLNL          |
| Motif7     | IWWVVSQDLTVEKIQDSIARKLG                  |
| Motif8     | SPCFSNLSSVRISDCNGLKDLTWLLFAPN            |
| Motif9     | PFRKLEYLRLSDLPELKSIIYWSPLPFPR            |
| Motif10    | IEVKCLDTDEAWELFKKKVGE                    |

Motif1, Motif3, Motif4, Motif7, Motif10 belongs to NB-ARC; and Motif6 encodes a LRR domain.

**Table S5 The promoters Cis-elements of CC-NB-LRR genes in Chinese cabbage.**

| Gene ID | Pomoter lengh | Cis-elements and Number | Function |
|---------|---------------|-------------------------|----------|
|---------|---------------|-------------------------|----------|

|           |      |                    |                                                                                                                                                                             |
|-----------|------|--------------------|-----------------------------------------------------------------------------------------------------------------------------------------------------------------------------|
| Bra011432 | 1500 | BIHD1OS(3)         | 1. <b>BIHD1OS</b> : Binding site of OsBIHD1 in disease resistance responses.                                                                                                |
|           |      | GT1CONSENSUS(24);  |                                                                                                                                                                             |
| Bra013947 | 265  | GT1GMSCAM4(7)      | 2. <b>GT1CONSENSUS</b> : Binding of GT-1-like factors to the PR-1a promoter influences the level of SA-inducible gene expression.                                           |
|           |      | SEBFCONSSTPR10A(1) |                                                                                                                                                                             |
| Bra026368 | 1500 | WRKY71OS(5)        | 3. <b>GT1GMSCAM4</b> : Pathogen- and NaCl-induced expression of the SCaM-4 promoter is mediated in part by a GT-1 box that interacts with a GT-1-like transcription factor. |
|           |      | GT1CONSENSUS(4);   |                                                                                                                                                                             |
| Bra031482 | 909  | GT1GMSCAM4(2)      | 4. <b>SEBFCONSSTPR10A</b> : Binding site of the potato silencing element binding factor (SEBF) gene found in promoter of pathogenesis-related gene (PR-10a).                |
|           |      | WBOXATNPR1(2)      |                                                                                                                                                                             |
| Bra035424 | 1500 | WRKY71OS(3)        | 5. <b>WRKY71OS</b> : Parsley WRKY proteins bind specifically to TGAC-containing W box elements within the Pathogenesis-Related Class10 (PR-10) genes.                       |
|           |      | BIHD1OS(3)         |                                                                                                                                                                             |
| Bra029405 | 1500 | GT1CONSENSUS(15)   | 6. <b>WBOXATNPR1</b> : They were recognized specifically by salicylic acid (SA)-induced WRKY DNA binding proteins.                                                          |
|           |      | GT1GMSCAM4(4)      |                                                                                                                                                                             |
| Bra029405 | 1500 | SEBFCONSSTPR10A(1) | 7. <b>WBOXPCWRKY1</b> : W box"; WRKY proteins bind specifically to the DNA sequence motif.                                                                                  |
|           |      | GT1CONSENSUS(7);   |                                                                                                                                                                             |

|           |      |                    |                                                                                                                                                  |
|-----------|------|--------------------|--------------------------------------------------------------------------------------------------------------------------------------------------|
| Bra013134 | 1500 | WBBOXPCWRKY1(1)    | 8. <b>MYB1LEPR</b> : Pti4(ERF) regulates defence-related gene expression via GCC box and non-GCC box cis elements (Myb1: GTTAGTT, G box: CACGTG) |
|           |      | WBOXATNPR1(2)      |                                                                                                                                                  |
|           |      | WRKY71OS(9)        |                                                                                                                                                  |
|           |      | BIHD1OS(2)         |                                                                                                                                                  |
|           |      | GT1CONSENSUS(11);  |                                                                                                                                                  |
| Bra013213 | 1500 | GT1GMSCAM4(3)      | 9. <b>ELRECOREPCR1</b> : consensus sequence of elements W1 and W2 of parsley PR1-1 and PR1-2 promoters, and WRKY1 protein binding site.          |
|           |      | WBBOXPCWRKY1(1)    |                                                                                                                                                  |
|           |      | WBOXATNPR1(5)      |                                                                                                                                                  |
|           |      | WRKY71OS(9)        |                                                                                                                                                  |
|           |      | BIHD1OS(2)         |                                                                                                                                                  |
| Bra019063 | 1489 | GT1CONSENSUS(16);  | 10. <b>TL1ATSAR</b> : "TL1", a consensus sequence over represented in the promoter regions of all 13 NPR1-responsive ER-resident genes surveyed. |
|           |      | GT1GMSCAM4(3)      |                                                                                                                                                  |
|           |      | WBOXATNPR1(2)      |                                                                                                                                                  |
|           |      | WRKY71OS(4)        |                                                                                                                                                  |
|           |      | BIHD1OS(4)         |                                                                                                                                                  |
| Bra036995 | 1500 | GT1CONSENSUS(7);   | 11. <b>Core of GCC-box</b> : many pathogen-responsive genes such as PDF1.2, Thi2.1, and PR4.                                                     |
|           |      | GT1GMSCAM4(2)      |                                                                                                                                                  |
|           |      | SEBFCONSSTPR10A(3) |                                                                                                                                                  |
|           |      | WBOXATNPR1(3)      |                                                                                                                                                  |
|           |      | WRKY71OS(9)        |                                                                                                                                                  |
| Bra036995 | 1500 | BIHD1OS(1)         | 12. <b>AGCBOXNPGLB</b> : Conserved in most PR-protein genes                                                                                      |
|           |      | GT1CONSENSUS(21);  |                                                                                                                                                  |
|           |      | GT1GMSCAM4(3)      |                                                                                                                                                  |
|           |      | SEBFCONSSTPR10A(1) |                                                                                                                                                  |
|           |      | WBBOXPCWRKY1(1)    |                                                                                                                                                  |
| Bra036995 | 1500 | WBOXATNPR1(3)      |                                                                                                                                                  |
|           |      |                    |                                                                                                                                                  |

|           |      |                   |
|-----------|------|-------------------|
|           |      | WRKY71OS(3)       |
|           |      | <hr/>             |
|           |      | BIHD1OS(3)        |
|           |      | ELRECOREPCRP1(1)  |
|           |      | GT1CONSENSUS(12); |
|           |      | GT1GMSCAM4(3)     |
| Bra018245 | 1500 | MYB1LEPR(2)       |
|           |      | WBBOXPCWRKY1(1)   |
|           |      | WBOXATNPR1(6)     |
|           |      | WRKY71OS(8)       |
|           |      | <hr/>             |
|           |      | BIHD1OS(1)        |
|           |      | ELRECOREPCRP1(1)  |
| Bra027332 | 1400 | GT1CONSENSUS(10); |
|           |      | GT1GMSCAM4(3)     |
|           |      | WRKY71OS(5)       |
|           |      | <hr/>             |
|           |      | BIHD1OS(2)        |
|           |      | GT1CONSENSUS(17); |
| Bra009882 | 1500 | GT1GMSCAM4(2)     |
|           |      | WBOXATNPR1(2)     |
|           |      | WRKY71OS(7)       |
|           |      | <hr/>             |
|           |      | BIHD1OS(2)        |
|           |      | GT1CONSENSUS(11); |
| Bra018834 | 1500 | GT1GMSCAM4(2)     |
|           |      | WBOXATNPR1(3)     |
|           |      | WRKY71OS(6)       |
|           |      | <hr/>             |
|           |      | BIHD1OS(3)        |
| Bra018835 | 700  | GT1CONSENSUS(12); |

|           |      |                    |
|-----------|------|--------------------|
|           |      | GT1GMSCAM4(3)      |
|           |      | WBOXATNPR1(2)      |
|           |      | WRKY71OS(4)        |
|           |      | <hr/>              |
|           |      | BIHD1OS(1)         |
|           |      | GT1CONSENSUS(9);   |
|           |      | GT1GMSCAM4(2)      |
| Bra018863 | 1500 | SEBFCONSSTPR10A(3) |
|           |      | WBBOXPCWRKY1(1)    |
|           |      | WBOXATNPR1(1)      |
|           |      | WRKY71OS(5)        |
|           |      | <hr/>              |
|           |      | BIHD1OS(2)         |
|           |      | GT1CONSENSUS(11);  |
|           |      | GT1GMSCAM4(1)      |
| Bra019752 | 1500 | WBBOXPCWRKY1(1)    |
|           |      | WBOXATNPR1(2)      |
|           |      | WRKY71OS(3)        |
|           |      | <hr/>              |
|           |      | BIHD1OS(4)         |
|           |      | ELRECOREPCRP1(1)   |
|           |      | GT1CONSENSUS(7);   |
| Bra019754 | 795  | GT1GMSCAM4(1)      |
|           |      | TL1ATSAR(1)        |
|           |      | WBOXATNPR1(3)      |
|           |      | WRKY71OS(6)        |
|           |      | <hr/>              |
|           |      | BIHD1OS(2)         |
| Bra019755 | 1500 | GT1CONSENSUS(11);  |
|           |      | GT1GMSCAM4(3)      |

|           |      |                    |
|-----------|------|--------------------|
|           |      | SEBFCONSSTPR10A(3) |
|           |      | WBOXATNPR1(1)      |
|           |      | WRKY71OS(4)        |
| Bra026094 | 340  | GT1CONSENSUS(5);   |
|           |      | GT1GMSCAM4(3)      |
|           |      | BIHD1OS(3)         |
| Bra016781 | 1500 | GT1CONSENSUS(13);  |
|           |      | GT1GMSCAM4(2)      |
|           |      | SEBFCONSSTPR10A(2) |
| Bra016782 | 1500 | WBOXATNPR1(5)      |
|           |      | WBBOXPCWRKY1(2)    |
|           |      | WRKY71OS(8)        |
| Bra016785 | 1500 | BIHD1OS(2)         |
|           |      | GT1CONSENSUS(13);  |
|           |      | GT1GMSCAM4(3)      |
| Bra030778 | 800  | SEBFCONSSTPR10A(1) |
|           |      | WBOXATNPR1(2)      |
|           |      | WRKY71OS(8)        |
| Bra016785 | 1500 | BIHD1OS(1)         |
|           |      | GT1CONSENSUS(8);   |
|           |      | GT1GMSCAM4(1)      |
| Bra016785 | 1500 | SEBFCONSSTPR10A(1) |
|           |      | WBBOXPCWRKY1(3)    |
|           |      | WBOXATNPR1(12)     |
| Bra030778 | 800  | WRKY71OS(6)        |
|           |      | BIHD1OS(2)         |



|           |      |                    |
|-----------|------|--------------------|
|           |      | ELRECOREPCRP1(1)   |
|           |      | GT1CONSENSUS(8);   |
|           |      | GT1GMSCAM4(1)      |
|           |      | WBOXATNPR1(4)      |
|           |      | WBBOXPCWRKY1(1)    |
|           |      | WRKY71OS(5)        |
|           |      | <hr/>              |
|           |      | BIHD1OS(5)         |
|           |      | GT1CONSENSUS(12);  |
|           |      | GT1GMSCAM4(6)      |
| Bra030779 | 1500 | MYB1LEPR(1)        |
|           |      | SEBFCONSSTPR10A(2) |
|           |      | WRKY71OS(7)        |
|           |      | WBOXATNPR1(2)      |
|           |      | <hr/>              |
|           |      | BIHD1OS(1)         |
|           |      | ELRECOREPCRP1(1)   |
|           |      | GT1CONSENSUS(19);  |
|           |      | GT1GMSCAM4(8)      |
| Bra034631 | 1249 | MYB1LEPR(1)        |
|           |      | SEBFCONSSTPR10A(1) |
|           |      | WBOXATNPR1(3)      |
|           |      | WRKY71OS(5)        |
|           |      | WBBOXPCWRKY1(1)    |
|           |      | <hr/>              |
|           |      | BIHD1OS(1)         |
|           |      | GT1CONSENSUS(2);   |
| Bra017572 | 526  | GT1GMSCAM4(1)      |
|           |      | WRKY71OS(1)        |
|           |      | <hr/>              |

|           |      |                    |
|-----------|------|--------------------|
| Bra026682 | 1500 | ELRECOREPCRP1(1)   |
|           |      | GCCCORE(1)         |
|           |      | GT1CONSENSUS(8);   |
|           |      | GT1GMSCAM4(1)      |
|           |      | WBOXATNPR1(4)      |
| Bra026923 | 1303 | WRKY71OS(7)        |
|           |      | GT1CONSENSUS(6);   |
|           |      | GT1GMSCAM4(1)      |
|           |      | SEBFCONSSTPR10A(1) |
|           |      | WBBOXPCWRKY1(1)    |
| Bra026924 | 644  | WBOXATNPR1(1)      |
|           |      | WRKY71OS(2)        |
|           |      | GT1CONSENSUS(3);   |
|           |      | GT1GMSCAM4(1)      |
|           |      | MYB1LEPR(1)        |
| Bra026977 | 1306 | WRKY71OS(1)        |
|           |      | BIHD1OS(4)         |
|           |      | GT1CONSENSUS(11);  |
|           |      | GT1GMSCAM4(2)      |
|           |      | SEBFCONSSTPR10A(1) |
| Bra026978 | 1215 | WBOXATNPR1(6)      |
|           |      | WRKY71OS(14)       |
|           |      | BIHD1OS(1)         |
|           |      | ELRECOREPCRP1(1)   |
|           |      | GT1CONSENSUS(10);  |
|           |      | GT1GMSCAM4(3)      |

|           |      |                    |
|-----------|------|--------------------|
|           |      | SEBFCONSSTPR10A(1) |
|           |      | WBBOXPCWRKY1(1)    |
|           |      | WBOXATNPR1(1)      |
|           |      | WRKY71OS(6)        |
|           |      | <hr/>              |
|           |      | BIHD1OS(2)         |
|           |      | GT1CONSENSUS(7);   |
|           |      | GT1GMSCAM4(4)      |
| Bra026979 | 1500 | SEBFCONSSTPR10A(3) |
|           |      | WBBOXPCWRKY1(1)    |
|           |      | WBOXATNPR1(1)      |
|           |      | WRKY71OS(9)        |
|           |      | <hr/>              |
|           |      | BIHD1OS(1)         |
|           |      | ELRECOREPCRP1(2)   |
| Bra027097 | 1500 | GT1CONSENSUS(8);   |
|           |      | GT1GMSCAM4(3)      |
|           |      | WBOXATNPR1(4)      |
|           |      | WRKY71OS(5)        |
|           |      | <hr/>              |
|           |      | BIHD1OS(2)         |
|           |      | ELRECOREPCRP1(1)   |
| Bra027866 | 1500 | GT1CONSENSUS(16);  |
|           |      | GT1GMSCAM4(2)      |
|           |      | WBOXATNPR1(2)      |
|           |      | WRKY71OS(4)        |
|           |      | <hr/>              |
|           |      | ELRECOREPCRP1(1)   |
| Bra036845 | 1500 | GT1CONSENSUS(17);  |
|           |      | GT1GMSCAM4(7)      |

|           |      |                    |
|-----------|------|--------------------|
|           |      | MYB1LEPR(1)        |
|           |      | WBOXATNPR1(1)      |
|           |      | WRKY71OS(1)        |
|           |      | <hr/>              |
|           |      | GT1CONSENSUS(3);   |
| Bra037123 | 315  | WBOXATNPR1(2)      |
|           |      | WRKY71OS(3)        |
|           |      | <hr/>              |
|           |      | AGCBOXNPGLB(1)     |
|           |      | GT1CONSENSUS(1);   |
| Bra037139 | 1500 | GT1GMSCAM4(1)      |
|           |      | WBOXATNPR1(1)      |
|           |      | WRKY71OS(7)        |
|           |      | <hr/>              |
|           |      | BIHD1OS(3)         |
|           |      | GT1CONSENSUS(9);   |
|           |      | GT1GMSCAM4(4)      |
| Bra002495 | 1500 | SEBFCONSSTPR10A(1) |
|           |      | WBBOXPCWRKY1(1)    |
|           |      | WBOXATNPR1(3)      |
|           |      | WRKY71OS(10)       |
|           |      | <hr/>              |
|           |      | BIHD1OS(1)         |
| Bra015597 | 1500 | GT1CONSENSUS(7)    |
|           |      | WRKY71OS(2)        |
|           |      | <hr/>              |

**TableS6 The statistics of sensitive and resistant lines to DM and BR**

| No. | Inbred line A24      |                        |          | Inbred line A95      |                        |          | Inbred line A96      |                        |          | Inbred line A167     |                        |          |
|-----|----------------------|------------------------|----------|----------------------|------------------------|----------|----------------------|------------------------|----------|----------------------|------------------------|----------|
|     | Whole area<br>(Mean) | Lesion areas<br>(Mean) | Rate (%) | Whole area<br>(Mean) | Lesion areas<br>(Mean) | Rate (%) | Whole area<br>(Mean) | Lesion areas<br>(Mean) | Rate (%) | Whole area<br>(Mean) | Lesion areas<br>(Mean) | Rate (%) |
| 1-1 | 86                   | 66                     | 76.7%    | 139                  | 27                     | 19.4%    | 65                   | 48                     | 73.8%    | 91                   | 18                     | 19.8%    |
| 1-2 | 92                   | 72                     | 78.3%    | 89                   | 17                     | 19.1%    | 107                  | 86                     | 80.4%    | 117                  | 20                     | 17.1%    |
| 2-1 | 108                  | 83                     | 76.9%    | 132                  | 26                     | 19.7%    | 92                   | 73                     | 79.3%    | 66                   | 13                     | 19.7%    |
| 2-2 | 105                  | 86                     | 81.9%    | 140                  | 29                     | 20.7%    | 118                  | 88                     | 74.6%    | 68                   | 11                     | 16.2%    |
| 3-1 | 96                   | 75                     | 78.1%    | 118                  | 23                     | 19.5%    | 76                   | 58                     | 76.3%    | 126                  | 21                     | 16.7%    |
| 3-2 | 90                   | 71                     | 78.9%    | 106                  | 21                     | 19.8%    | 128                  | 96                     | 75%      | 123                  | 23                     | 18.7%    |

**TableS7 Primers of qPCR**

| Gene No.  | Forward primer Sequence (5'-3') | Reverse primer Sequence (5'-3') |
|-----------|---------------------------------|---------------------------------|
| Bra011432 | TCTTTTTTCTTTTCGGTCGA            | CGCAGTGAGAGTGACATGGT            |
| Bra013947 | AGGGAGGTTTATGCGTCGG             | AGTTTGTACTCAGCACAACTAAGC        |
| Bra026368 | TAAGTCCTTGAAATCCAGGCTAAG        | TCTAAACCTTCCTTTTCGAGCA          |
| Bra031482 | CAACAAGGTTTGAACAATTTTT          | AAGTTGCATACCCCTGATCGT           |
| Bra035424 | TTTCCAGGAGCAGGTGATTC            | GGATTCAATCCACAAATCGTTG          |
| Bra029405 | TGGGATTCAGGTGCAAGAG             | AACGGTAAAAGTGCCACTGC            |
| Bra013134 | TATGAGTACACTAATTCTGTAAATT       | CACTAGAGGAAATCCAGGACG           |
| Bra013213 | AGTGCTTTGATATATTGCATTTTGC       | TTTACAGAATTAGTGTA CTC           |
| Bra019063 | TGTGAAGACCATATAAAGTCAGCA        | TGAGGCACCAACGACTTCTTA           |
| Bra036995 | AGAATGATCAAAGTCTTCATATGGAA      | CTTTGCTCCAATACGACGAA            |
| Bra018245 | CAAGGATCTCAGGGACGATT            | CTCTGAACAGTTGCGAGCC             |

|           |                           |                             |
|-----------|---------------------------|-----------------------------|
| Bra027332 | TAGAGAGGCTCAACACTGCG      | CCGCTGGGTTTGTAACTGT         |
| Bra009882 | AAGTAATTGCGCGGCAAGTG      | GCTTCCGCTCAATGGCTAAG        |
| Bra018834 | TGGCTTACTATTTTCTCACCAAGTC | ACTGCTTTGGTGAATGAACAAG      |
| Bra018835 | CGGTCTTACTAGCTGGAGGC      | GAATGGACAAGAGAAAGAGGACA     |
| Bra018863 | CCGGATATTCCCACACTTG C     | GGCTTTGCCAATCACATTGA        |
| Bra019752 | TGTTAAGTCATGTTTCCTCTATTGC | CCTCACCGATCCAATATTTAATTA    |
| Bra019754 | CGCCACGCAGTTAAGACTTT      | GCTATACTTCAAACTGGAAGAA      |
| Bra019755 | CATTGCGAAAAAACTAGGCCT     | ACGTTGTGGATGTCAAGAGCT       |
| Bra025017 | TTGCATCAAACCAAACACTGA     | CCCATCAACTGTTGCTTTAGC       |
| Bra026094 | TGGCTGCTTATTCGGTGATG      | AGGTTTGCTTCCATTGTGTGAA      |
| Bra016781 | CAGATAATAGAGGCATACAGCCATT | TTTTAAGCTCTAATAAGCATGC      |
| Bra016782 | TACTGACCGAAGAGGTAGAAGGA   | CCACATCATGCATTTTCACC        |
| Bra016785 | AGGTTGATTTTAAGTACCTTGAGGA | TGCTGAGCCTACGGAGATTG        |
| Bra030778 | AGGTGGTGGCTAGGAGGATTC     | CGAGCGTCTTCTCTAAACCG        |
| Bra030779 | AGAGAGCCACTGAACCCACA      | TTCCAACGTCCTTCTCCATC        |
| Bra034631 | CAAAAGTGTTGCGGTTCTTG      | TCGACCACGGAAGTCTCAAT        |
| Bra017572 | CCGTTGGCAGTCAGCGTTAT      | CAAAGCGTCGATTGCATACC        |
| Bra026682 | TGCAGTTTGTGGACGAGGAG      | ATGTAGTAGTTTCAGTGTCTCAAGC   |
| Bra026923 | GCTTTTCCGGAGACAGCAT       | ACACAGCCAGAAGCTAAGCA        |
| Bra026924 | TCTTTTTTGTGGTCTTAAAGTGT   | GCTAAACAATAATTAGAAAGGAAGGAA |
| Bra026977 | AGGATCATTTTCTAGATGGAGGAG  | ATGAGCGCATGAGTTCAGAG        |
| Bra026978 | TTCCCGGAGACAGTATTGATTA    | TTTGTGGTTGTTGCTGTCTTAAC     |
| Bra026979 | AAGAGGTGGCTAGTCCTGCTG     | GCATTGTTTCTTGACCAACG        |
| Bra027097 | TTCTGGTCAAGAACTCCGAT      | GCCTCTTCACGACTTCAGGT        |
| Bra027866 | AGATGCAAACGCAAAAAAGC      | TCAGCGTCAAGAACAATCTCAT      |
| Bra036845 | TCCCGTGAAGAAGAAGGATT      | CTGAGCTCGTAAGAACGCAC        |

|           |                           |                              |
|-----------|---------------------------|------------------------------|
| Bra037123 | TCAGGCTTACGGCATAGGAA      | TCAACAGGTCGAGCACGTC          |
| Bra037139 | CTTCCTTGTCTACCTTCTATCGTTT | TCAGATTATAAGATTTTAGGAGACCTCT |
| Bra002495 | GGTGTGTGCAGGTGAAACCA      | GAGGGAACCGAAAAAATGATATAA     |
| Bra015597 | TGGTTGAACTTTAATATACGGCTG  | GCTGAGCCCAAAGTGAGTGA         |

---

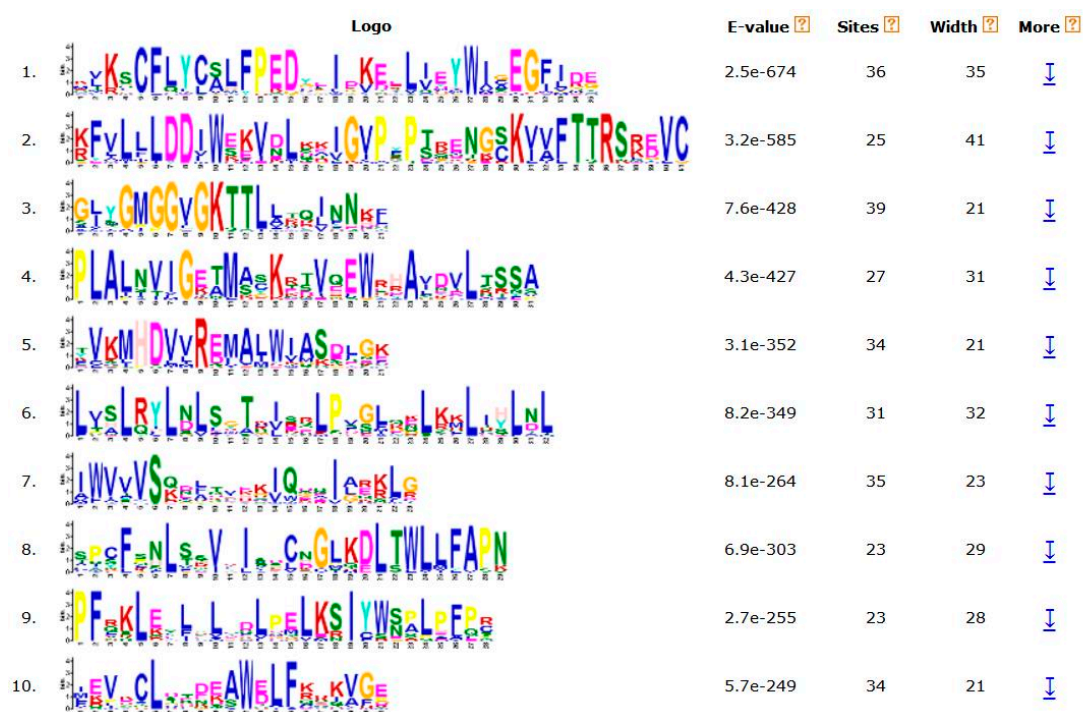

Figure S1 Sequence logos of motifs in BrCC-NBS-LRR

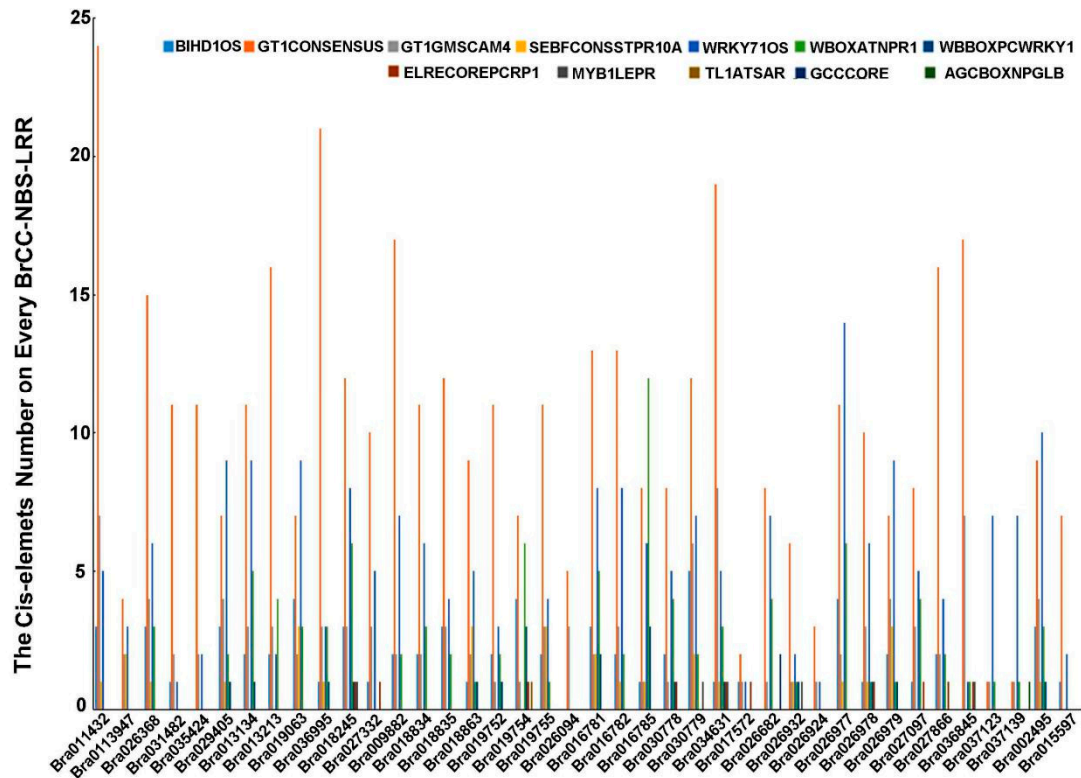

**Figure S2** The number of different type cis-elements on each *BrCC-NBS-LRR* promoter.

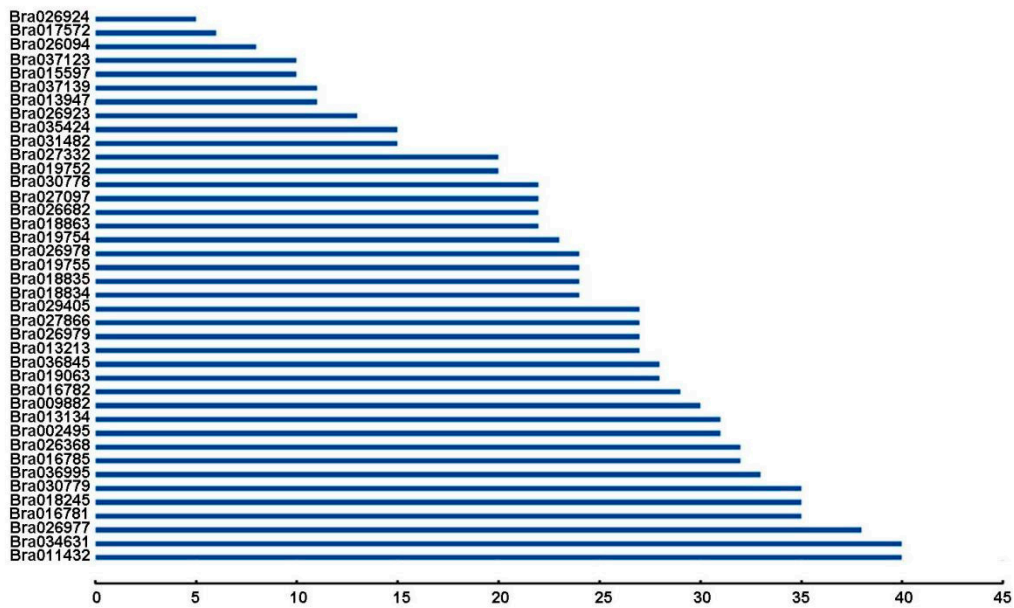

**Figure S3**, The total disease resistant related cis-element number on each Chinese cabbage CC-NB-LRR promoter.



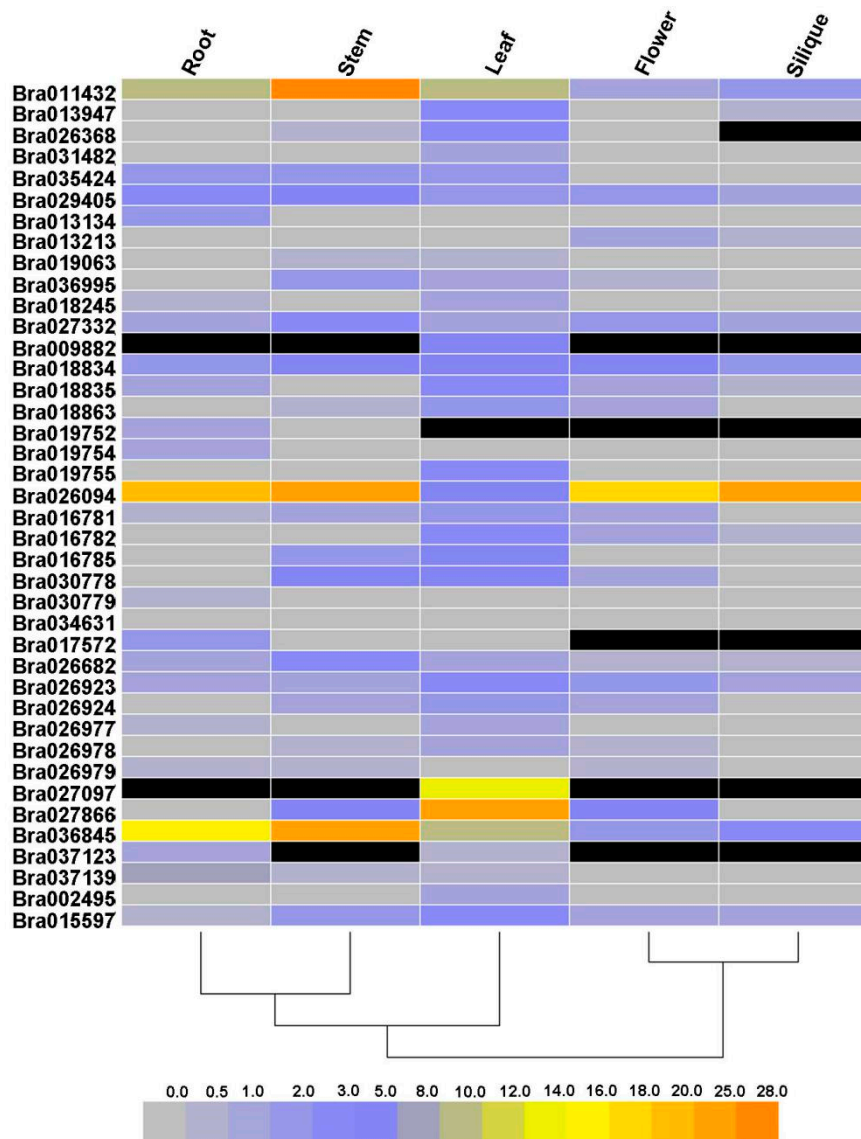

Figure S4 Hot map of *BrCC-NBS-LRRs* in root, stem, leaf, flower and silique(Black represented undected)
